# Supplementary material for: Transmission-Blocking Vaccines against Schistosomiasis Japonica
Source: MDPI journal article supplement (doi:10.3390/ijms25031707), 2024-01-30
Supplement: s1 [file s1]

Supplementary Table 1: The three common species of *Schistosoma* affecting humans

| Species                                              | <i>Schistosoma haematobium</i>                                                                                                                                                 | <i>Schistosoma mansoni</i>                                                                                                                                 | <i>Schistosoma japonicum</i>                                                                                                                                                                   |
|------------------------------------------------------|--------------------------------------------------------------------------------------------------------------------------------------------------------------------------------|------------------------------------------------------------------------------------------------------------------------------------------------------------|------------------------------------------------------------------------------------------------------------------------------------------------------------------------------------------------|
| <b>Distribution</b>                                  | Africa, Middle East, Corsica (France)                                                                                                                                          | Africa, the Middle East, the Caribbean, Brazil, Venezuela, and Suriname                                                                                    | South of China, Philippines, and Indonesia                                                                                                                                                     |
| <b>Intermediate host (snails)</b>                    | <i>Bulinus</i> spp [24]                                                                       | <i>Biomphalaria</i> spp [24]                                            | <i>Oncomelania</i> spp [24]                                                                                 |
| <b>Eggs</b>                                          | Laid singly (150/day [24]) and excreted in urine. <br>Terminal spine                          | Laid singly (300/day [24,25]) and excreted in faeces. <br>Lateral spine | Laid in clusters (1000-2200/day [24,25]) and excreted in faeces. <br>Small (almost invisible) lateral spine |
| <b>Definitive host (Human and mammalian animals)</b> | Mostly Human                                                                                                                                                                   | Mostly Humans and rodents.                                                                                                                                 | Humans and about 46 domestic animals [37] including water buffalo, cattle, sheep, dogs, baboons, pigs, and rodents.                                                                            |
| <b>Host pathology</b>                                | Urogenital schistosomiasis results in haematuria, genital lesions, vaginal bleeding scarring, calcification, kidney failure, bladder squamous cell carcinoma, and infertility. | Hepato- intestinal schistosomiasis causes liver fibrosis, ascites, portal hypertension, hepato-splenomegaly, jaundice, CNS lesions.                        |                                                                                                                                                                                                |
